# Supplementary material
Source: Research Square preprint supplement (doi:10.21203/rs.3.rs-8717401/v1)
Supplement: Supplementary file 1 [file df6ea63c03d48ddc76852b58.docx]

Supporting Information

Gold nanocluster-complexed dressings for instant closure of bacteria-infected wound

Shanchen Cai, Wenfu Zheng, Ting Lin, Siyuan Zhang, Lanye He, Mali Zu, Le Wang*


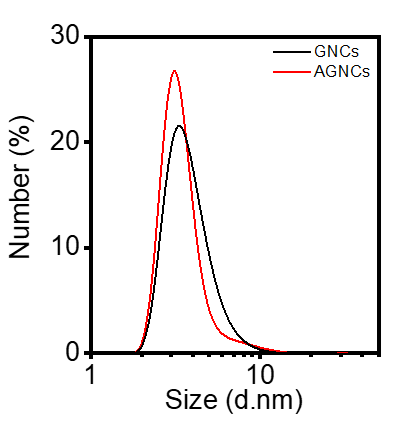


**Figure S1.** The size distribution of GNCs and the AGNCs.


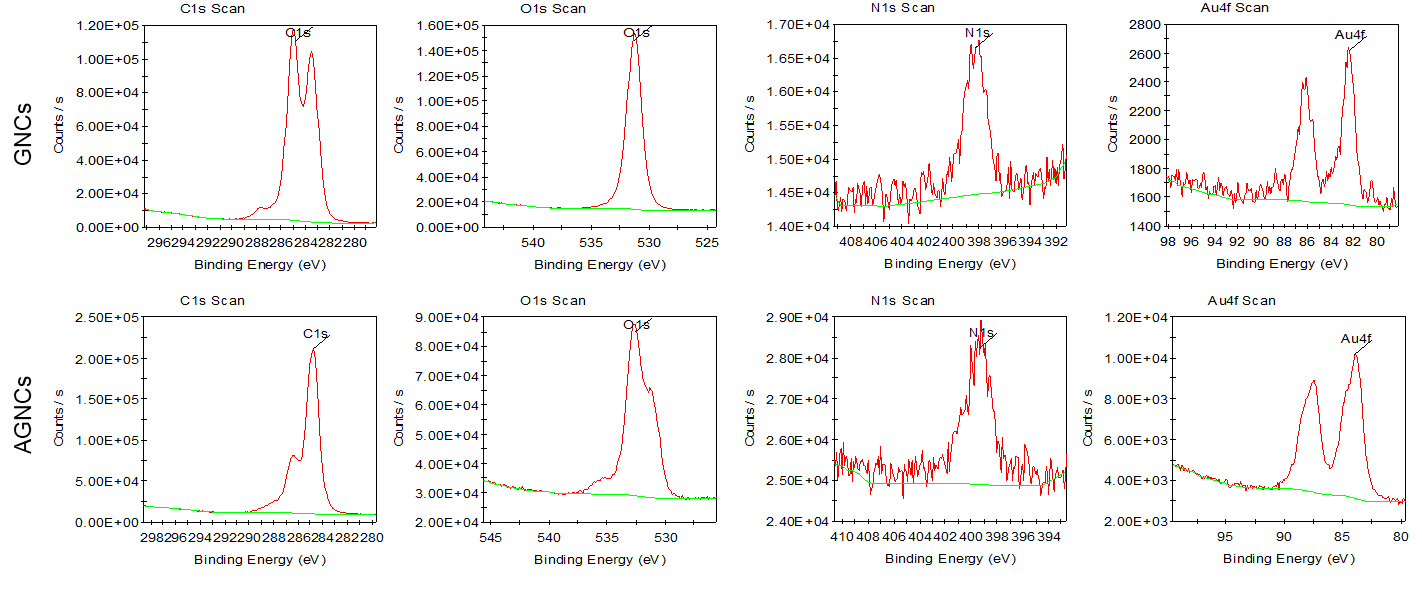


**Figure S2.** Chemical components of GNCs and AGNCs analyzed by XPS.


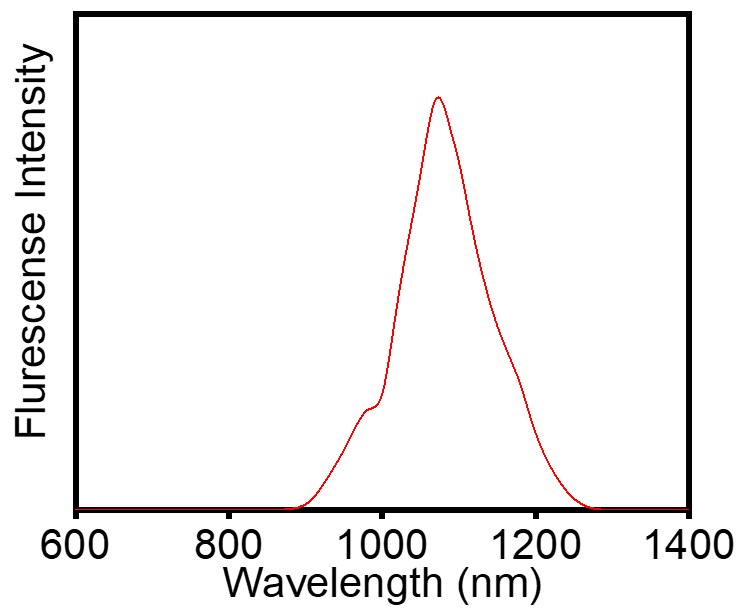


**Figure S3.** Fluorescence emission spectrum of AGNCs under 808 nm laser excitation.


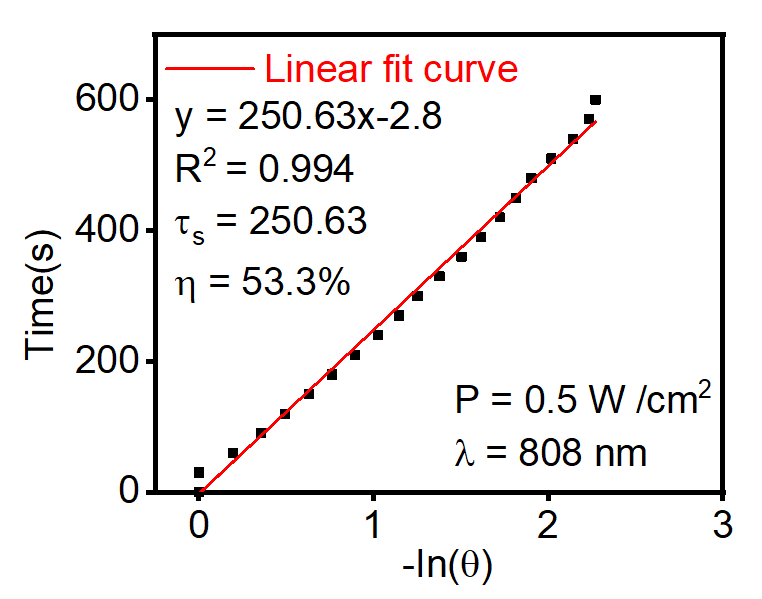


**Figure S4.** Photothermal conversion efficiency of AGNCs (200 µg/mL) was evaluated by monitoring the cooling process to room temperature and performing linear fitting analysis.


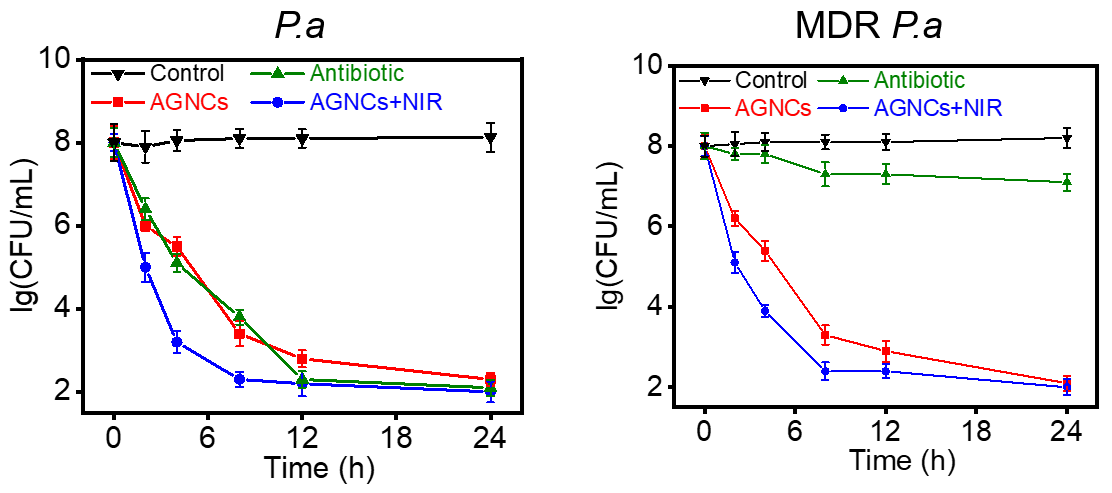


**Figure S5.** Bactericidal activities of AGNCs with and without NIR irradiation (0.5 W/cm2, 5 min).


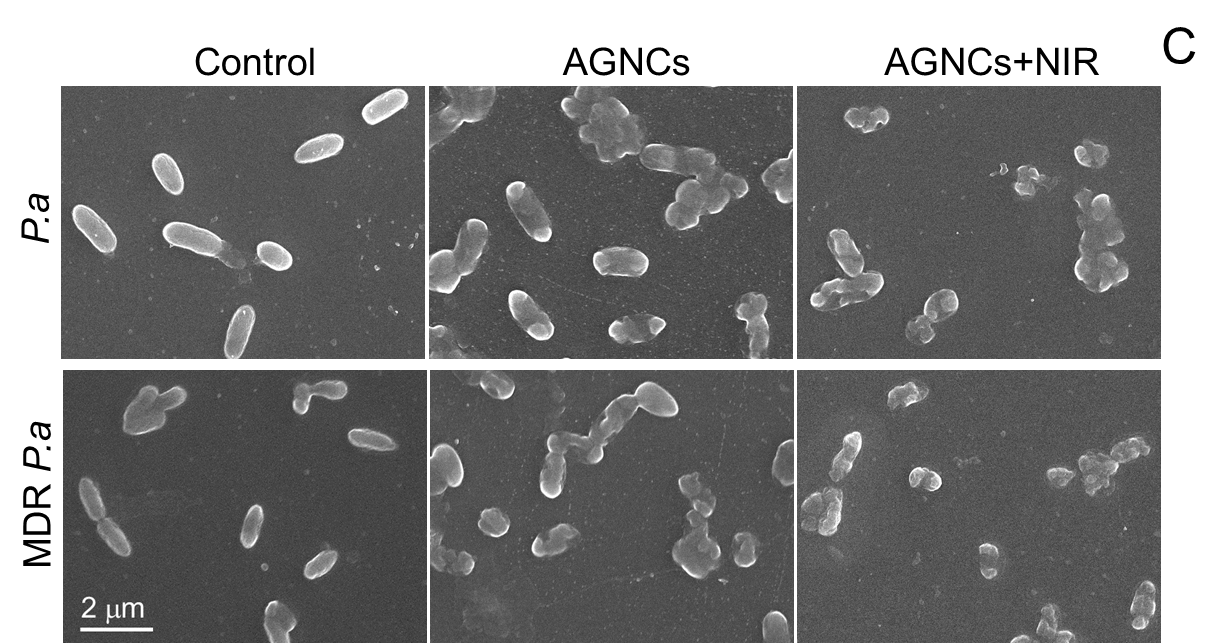


**Figure S6.** SEM images illustrating morphological changes in bacteria following treatment with AGNCs with or without NIR irradiation (0.5 W/cm2, 5 min).

**
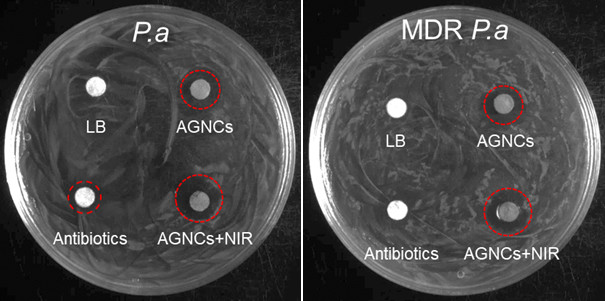
**

**Figure S7.** Antibacterial efficacy of AGNCs with or without NIR irradiation evaluated using the inhibition zone assay.


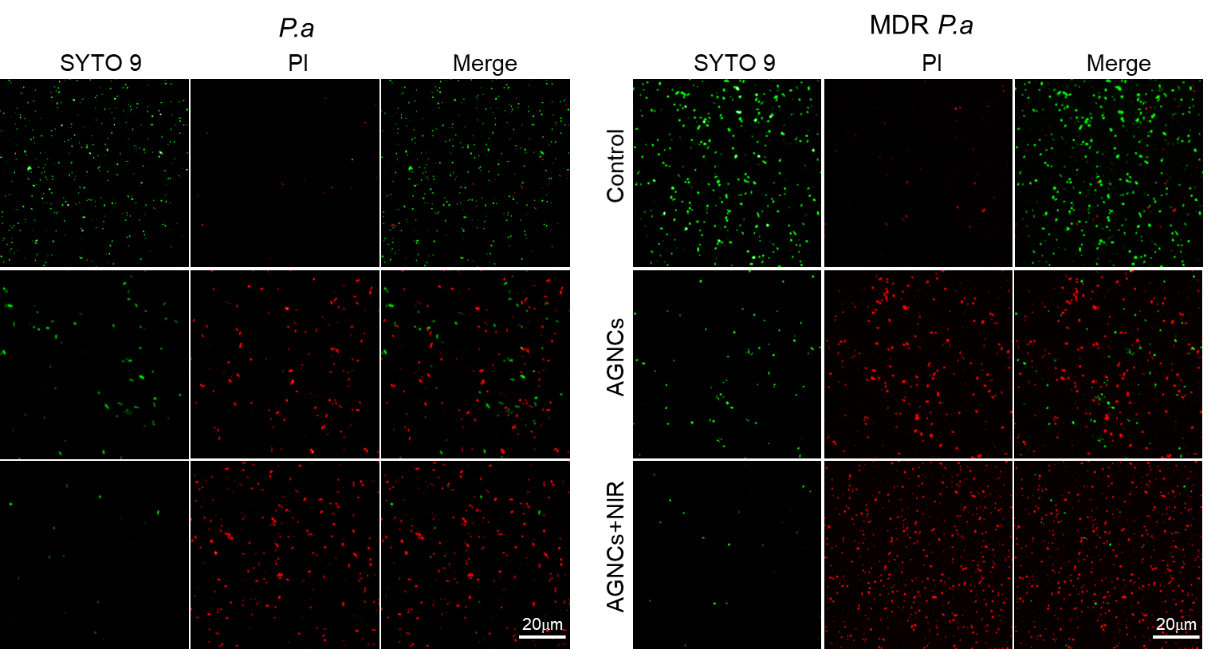


**Figure S8.** Assessment of *P. a* and MDR *P. a* viability following AGNC treatment with or without NIR irradiation, using SYTO 9 (green, live cells) and propidium iodide (red, dead cells) staining to evaluate membrane permeability. NIR irradiation condition was set as 0.5 W/cm2 for 5 min.


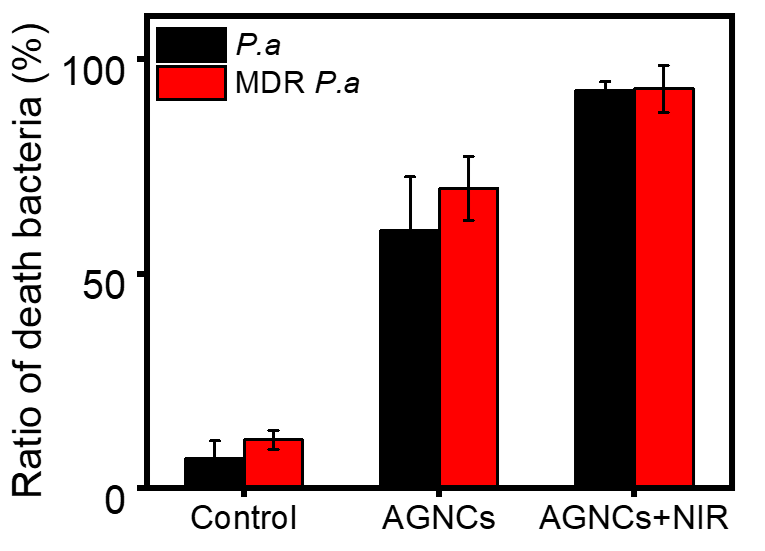


**Figure S9.** Changes in bacterial viability induced by AGNCs with and without NIR irradiation.


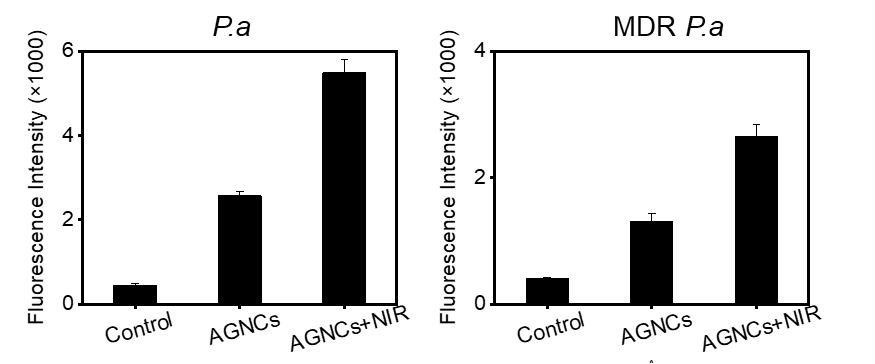


**Figure S10.** Total ROS levels in bacteria following AGNCs treatment with and without NIR irradiation measured by fluorescence intensity.


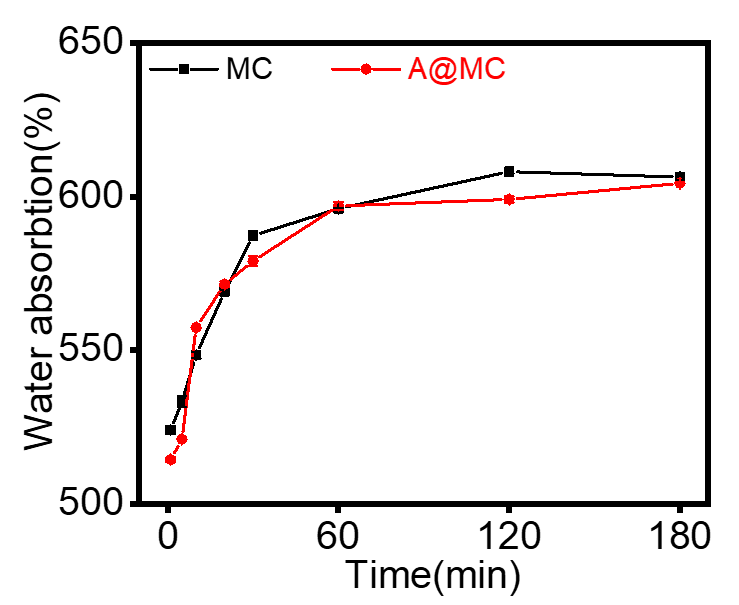


**Figure S11.** Swelling behavior of MC and A@MC hydrogels over time.


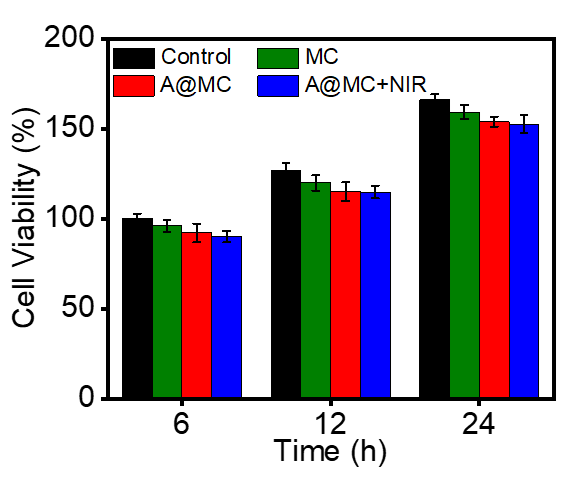


**Figure S12.** Viability of NIH-3T3 cells after co-incubation with solidified A@MC hydrogel with or without NIR irradiation.


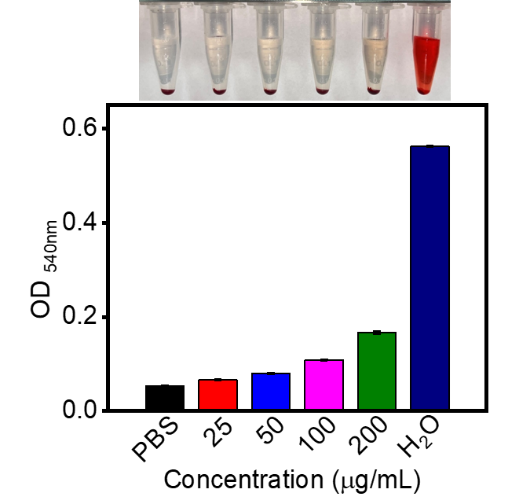


**Figure S13.** Hemolysis assay of AGNCs at different concentrations. PBS was used as the negative control and water as the positive control.


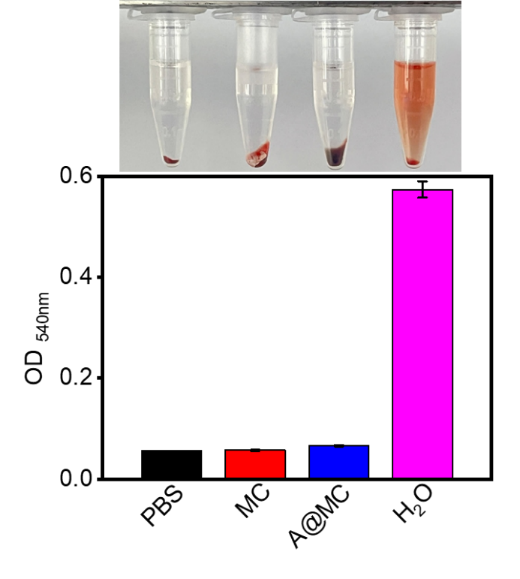


**Figure S14.** Hemolysis assay of MC and A@MC hydrogels. PBS was used as the negative control and water as the positive control.


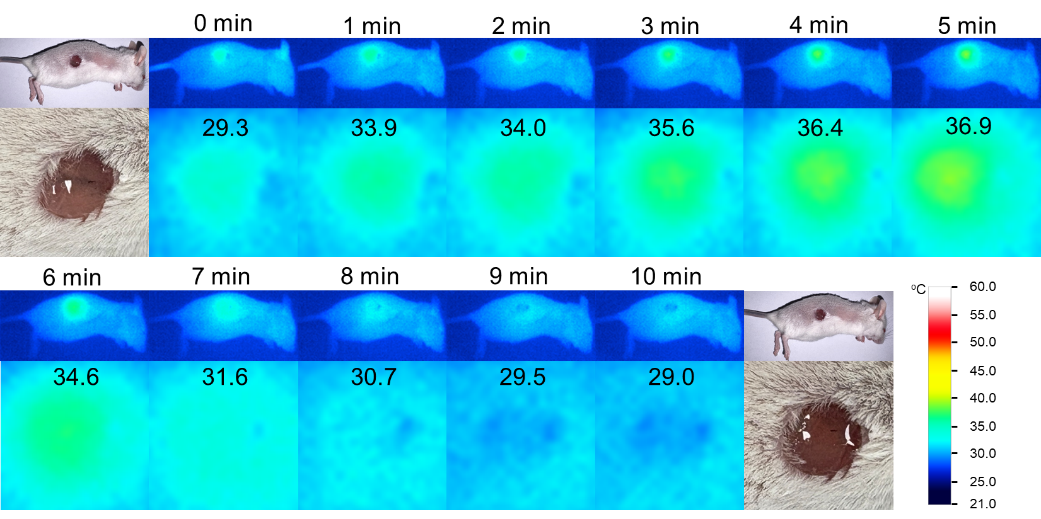


**Figure S15.** Thermal imaging of skin wounds in mice treated with MC hydrogels before and after NIR irradiation (808 nm, 0.5 W/cm²) for 5 min.


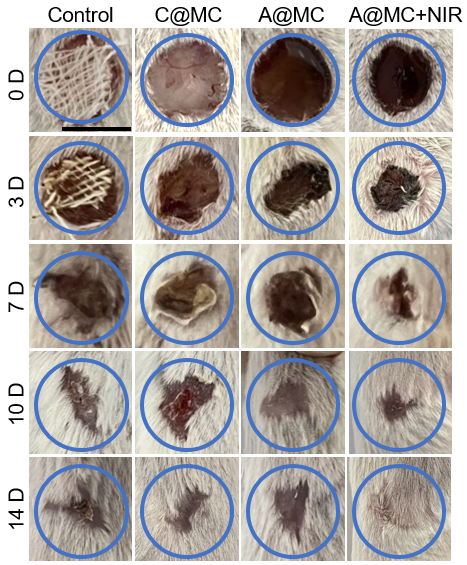


**Figure S16.** Representative photographs showing *P. a*-infected wound healing progression under various treatments on day 3, 7, 10, and 14 (scale bar, 1 cm).


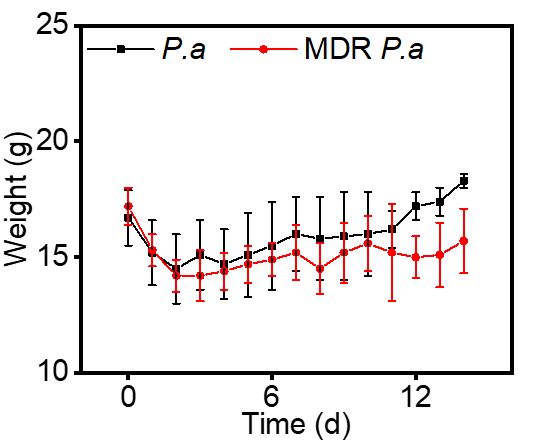


**Figure S17.** Body weight fluctuations following wound infections induced by *P. a* and MDR *P. a*.


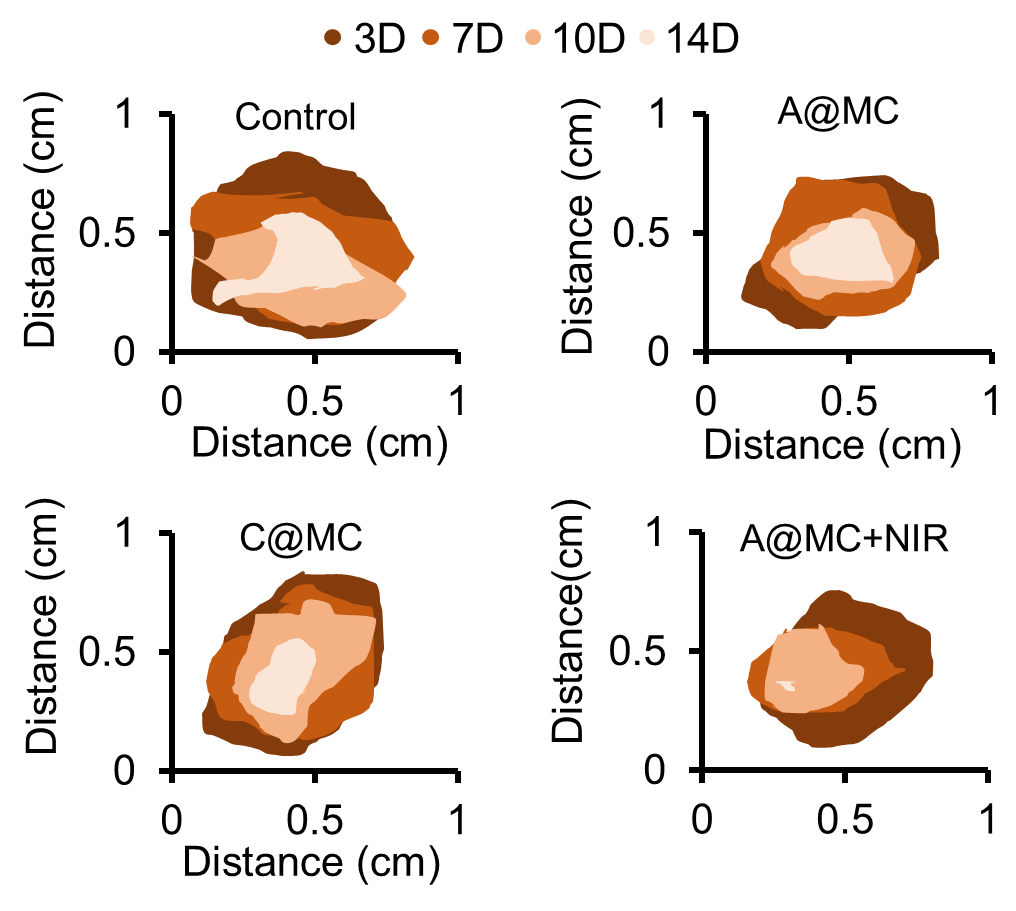


**Figure S18.** *P. a*-infected wound size tracking and analysis across different treatment groups over time.


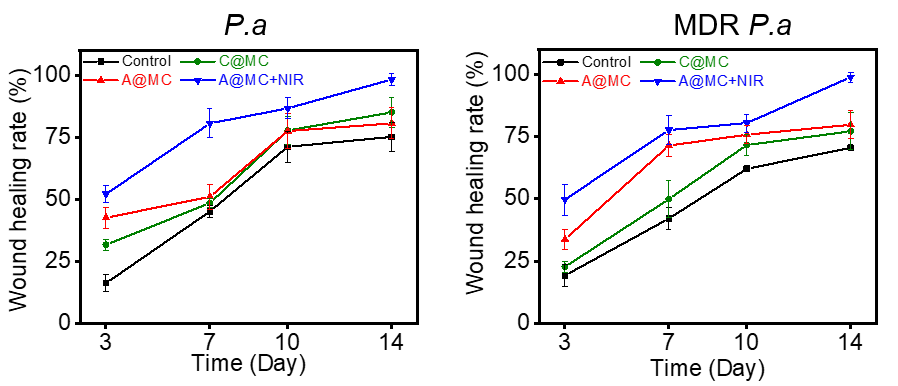


**Figure S19.** Wound closure ratios in *P. a*-infected and MDR *P. a*-infected wounds across four treatment groups at various time points.


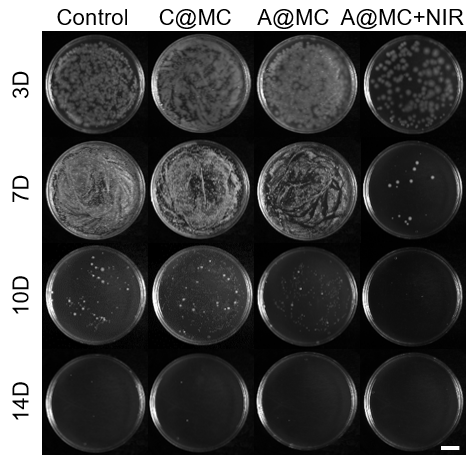


**Figure S20.** Quantification of bacterial load in *P. a*-infected tissues following different treatments (scale bar: 1 cm).


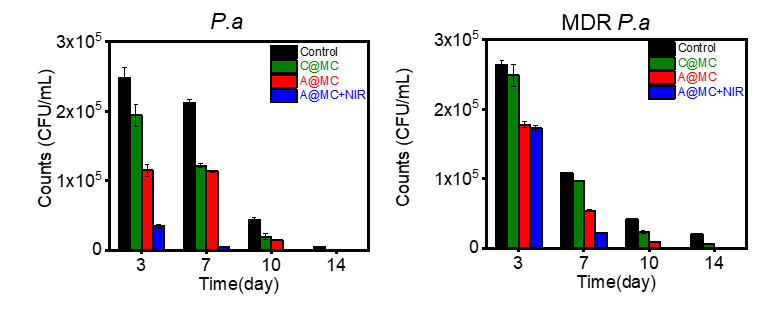


**Figure S21.** Quantitative analysis of bacterial residues in infected wounds following various treatments at different time points.


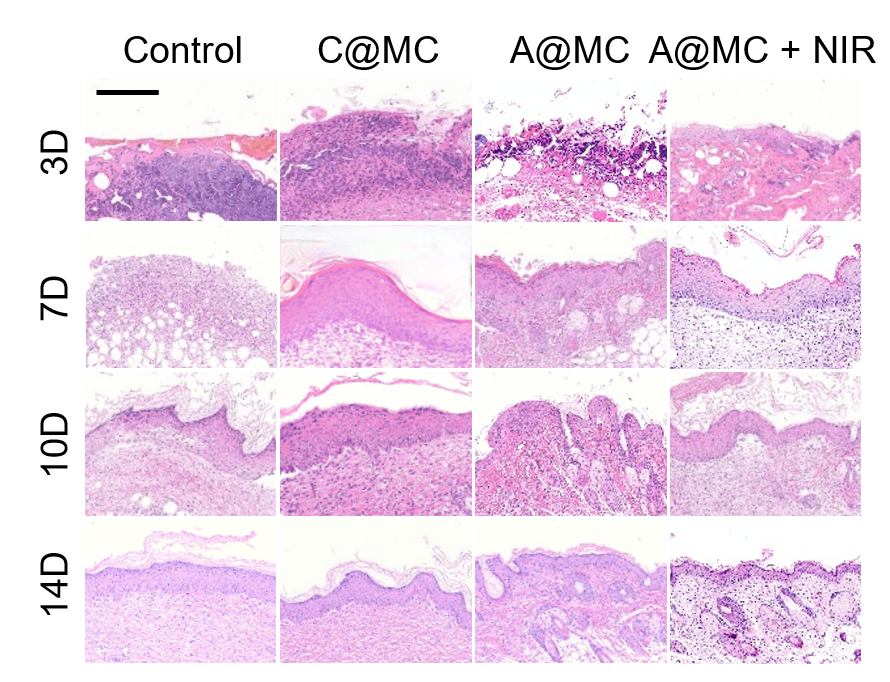


**Figure S22.** HE staining of wound tissues infected with *P. a* under various treatments (scale bar, 50 μm).


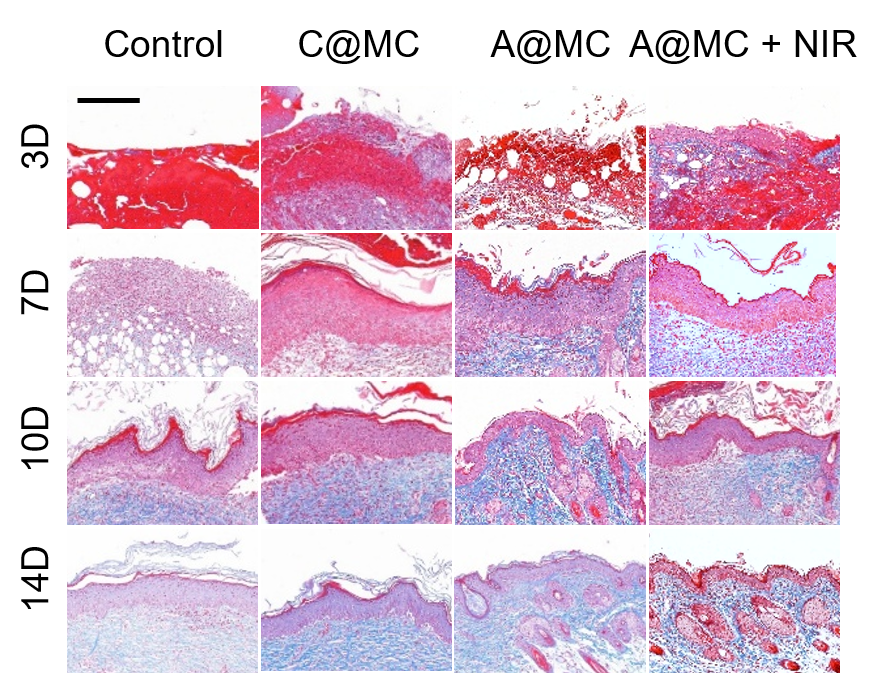


**Figure S23.** Masson’s trichromatic staining of wound tissues infected with *P. a* under various treatments (scale bar, 50 μm).


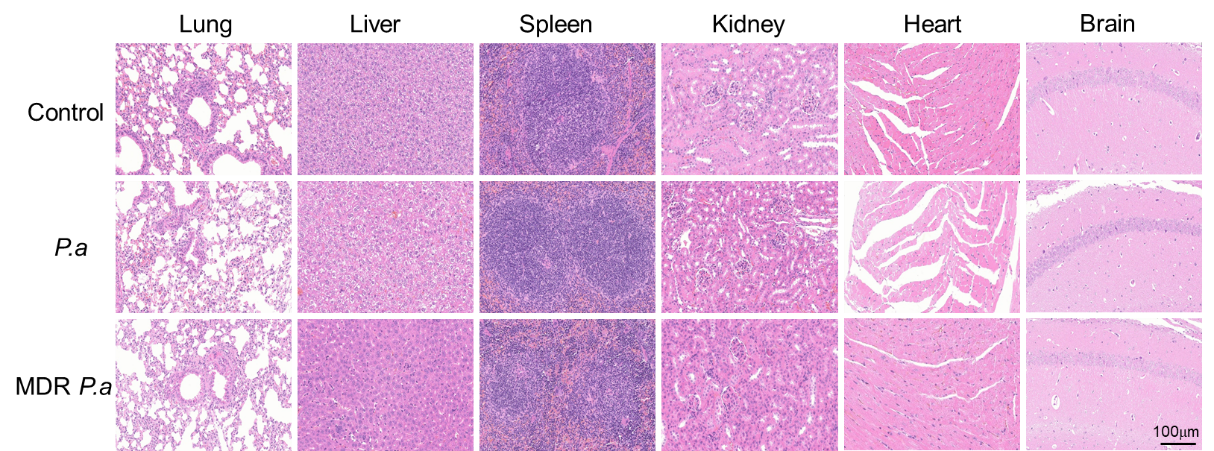


**Figure S24.** HE stained sections of various organs collected during bacterial infection treatment.

**Table S1.** MIC (μg/mL) of AGNCs and antibiotics against different bacteria.

|  | *E.coli* | *P.a* | *K.p* | MDR *E.coli* | MDR *P.a* | MDR *K.p* |
| --- | --- | --- | --- | --- | --- | --- |
| AGNCs | 10 | 5 | 20 | 10 | 5 | 10 |
| Antibiotics | 1 | 2 | 2 | 32 | >64 | >64 |

**Table S2.** The antibacterial effects of various materials are evaluated by measuring the diameters and average areas of the inhibition zones.

|  |  | Control | Antibiotics | AGNCs | AGNCs+NIR |
| --- | --- | --- | --- | --- | --- |
| *P. a* | Diameter (cm) | / | 0.72 | 0.84 | 1.03 |
| Area (mm2) | / | 407.15 | 554.18 | 833.23 |
| MDR *P. a* | Diameter (cm) | / | / | 0.86 | 1.05 |
| Area (mm2) | / | / | 580.88 | 865.90 |

**Table S3.** Comparison of the shrinkage of MC and A@MC hydrogels before and after light irradiation.

|  | Area before irradiation (mm2) | Area after irradiation (mm2) | Shrinkage(%) |
| --- | --- | --- | --- |
| A@MC | 33.96 | 10.56 | 68.90 |
| MC | 31.37 | 30.11 | 4.02 |

**Table S4.** Comparison of the shrinkage of MC and A@MC hydrogels before and after NIR irradiation (808 nm, 0.5 W/cm2) for 5 min on mice.

|  | Area before irradiation (mm2) | Area after irradiation (mm2) | Shrinkage (%) |
| --- | --- | --- | --- |
| A@MC | 345.54 | 183.91 | 46.78 |
| MC | 311.69 | 288.57 | 7.42 |

**Table S5.** Serum biochemical indicators reflecting the function of liver and kidney function during the treatment of bacterial infections.

|  |  |  | *P. a* | | | | MDR *P. a* | | | |
| --- | --- | --- | --- | --- | --- | --- | --- | --- | --- | --- |
|  | Ref | Unit | 3D | 7D | 10D | 14D | 3D | 7D | 10D | 14D |
| ALB | 23.0-45.0 | g/L | 31.2 | 30.4 | 32.0 | 33.0 | 30.3 | 32.3 | 35.8 | 33.1 |
| TP | 50.0-75.0 | g/L | 57.3 | 55.8 | 62.5 | 63.2 | 56.9 | 64.1 | 57.8 | 60.9 |
| GLB | 20.0-40.0 | g/L | 26.1 | 25.4 | 26.5 | 30.2 | 26.6 | 28.9 | 29.0 | 27.8 |
| AST | 75-145 | U/L | 106 | 124 | 122 | 132 | 125 | 134 | 139 | 137 |
| ALT | 8-60 | U/L | 44.2 | 31.5 | 36.3 | 44.6 | 40.9 | 42.5 | 33.5 | 35.8 |
| ALP | 70-180 | U/L | 77.0 | 92.2 | 102.7 | 106.4 | 84.6 | 97.8 | 109.1 | 122.8 |
| TBA | 1.00-11.00 | mol/L | 3.38 | 4.04 | 5.63 | 4.26 | 2.38 | 3.82 | 3.91 | 4.67 |
| BUN | 5.50-10.20 | mmol/L | 7.8 | 8.56 | 7.72 | 8.7 | 8.59 | 8.55 | 7.17 | 8.43 |
| CREA | 25.0-40.0 | mol/L | 32.4 | 30.0 | 32.3 | 30.4 | 33.1 | 31.9 | 32.8 | 34.8 |
